# Supplementary material for: Restricted diffusion of model sulfides over a NiMo/BK catalyst under hydrodesulfurization reaction conditions
Source: Royal Society of Chemistry journal article supplement (doi:10.1039/c7ra07833a), 2017-01-01
Supplement: c7ra07833a1.pdf [file c7ra07833a1.pdf]

## Supplementary Information

### Restricted diffusion of model sulfides over NiMo/BK catalyst under hydrodesulfurization reaction conditions

Huadong Wu<sup>a,b</sup>, Aijun Duan<sup>1,\* ,b</sup>, Zhen Zhao<sup>\*,b</sup>, Chunming Xu<sup>b</sup>, Guiyuan Jiang<sup>b</sup>, Jian  
Liu<sup>b</sup>, Yuechang Wei<sup>b</sup>, Jianmei Li<sup>b</sup>, Kebin Chi<sup>c</sup>, Jia Guo<sup>a</sup>

<sup>a</sup> Key Laboratory of Green Chemical Process (Wuhan Institute of Technology), Ministry of Education, Hubei Key Laboratory of Novel Chemical Reactor and Green Chemical Technology, Wuhan 430073, P. R. China

<sup>b</sup> State Key Laboratory of Heavy Oil Processing, China University of Petroleum, Beijing, P. R. China

<sup>c</sup> Petrochemical Research Institute, PetroChina Company Limited, Beijing, P. R. China

\* Corresponding authors: Tel: 86-10-89731586; Fax: 86-10-69724728;

E-mail address: zhenzhao@cup.edu.cn;

<sup>1</sup> This author has equal contribution as the first author.

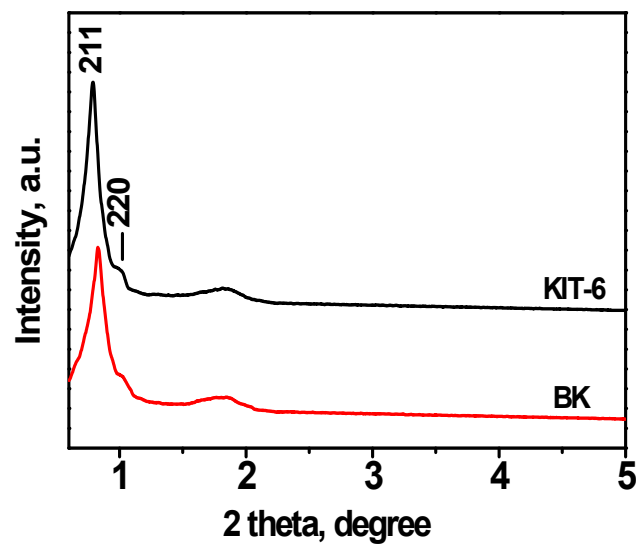

Fig. S1 Small angle XRD patterns of the synthesized BK and KIT-6 materials.

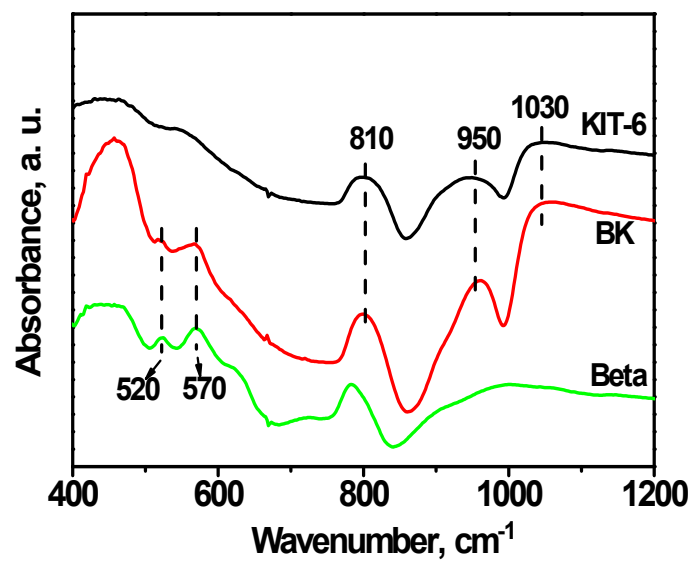

Fig. S2 FTIR spectra of the as-synthesized materials.

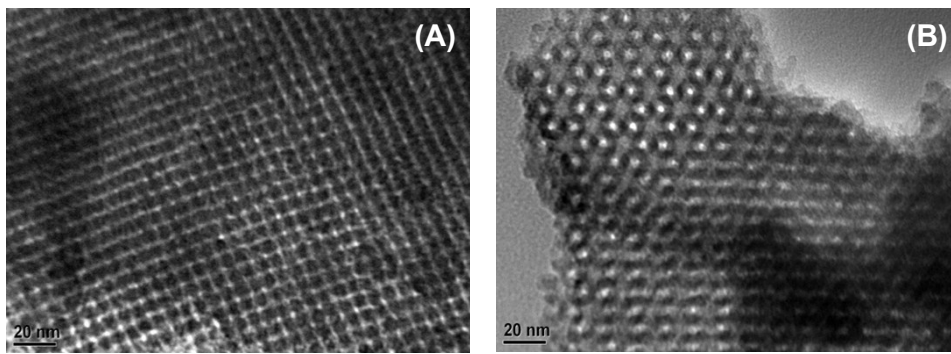

**Fig. S3 TEM images of the as-synthesized BK support.**
